# Supplementary material for: A 1T′-MoTe2/GaN van der Waals Schottky junction for self-powered UV imaging and optical communication
Source: Royal Society of Chemistry journal article supplement (doi:10.1039/d4nr01366b), 2024-01-01
Supplement: d4nr01366b1.pdf [file d4nr01366b1.pdf]

## Supporting Information

### **1T'-MoTe<sub>2</sub>/GaN Van der Waals Schottky Junction for Self-powered UV Imaging and Optical Communication**

Lenan Gao<sup>a</sup>, Bangbang Yang<sup>a</sup>, Junli Du<sup>b, \*</sup>, Cheng Zhang<sup>c</sup>, Shihong Ma<sup>a</sup>, Zhaowei Guo<sup>a</sup>,  
Yu Wang<sup>a</sup>, Jian Wang<sup>a</sup>, Xinjian Li<sup>a</sup>, Di Wu<sup>a</sup>, Pei Lin<sup>a, \*</sup>

<sup>a</sup> *Key Laboratory of Materials Physics, Ministry of Education, School of Physics, Zhengzhou University, Zhengzhou 450001, China*

<sup>b</sup> *State Grid Henan Electric Power Research Institute, Zhengzhou 450052, China*

<sup>c</sup> *National Joint Engineering Research Center for Abrasion Control and Molding of Metal Materials, School of Materials Science and Engineering, Henan University of Science and Technology, Luoyang 471003, China*

\* Corresponding authors.

E-mail addresses: linpei@zzu.edu.cn (Pei Lin), 17801052606@163.com (Junli Du)

**Table S1.** Electrical properties of as-purchased GaN film

|                       |                                                    |
|-----------------------|----------------------------------------------------|
| Thickness             | $4.5 \pm 0.5 \mu\text{m}$                          |
| Substrate             | Sapphire                                           |
| Orientation           | C-plane (0001)                                     |
| Conduction type       | n-type                                             |
| Resistivity (300 K)   | $< 0.5 \Omega \cdot \text{cm}$                     |
| Carrier concentration | $< 5 \times 10^{17} \text{cm}^{-3}$                |
| Mobility              | $\sim 300 \text{cm}^2 \text{V}^{-1} \text{s}^{-1}$ |

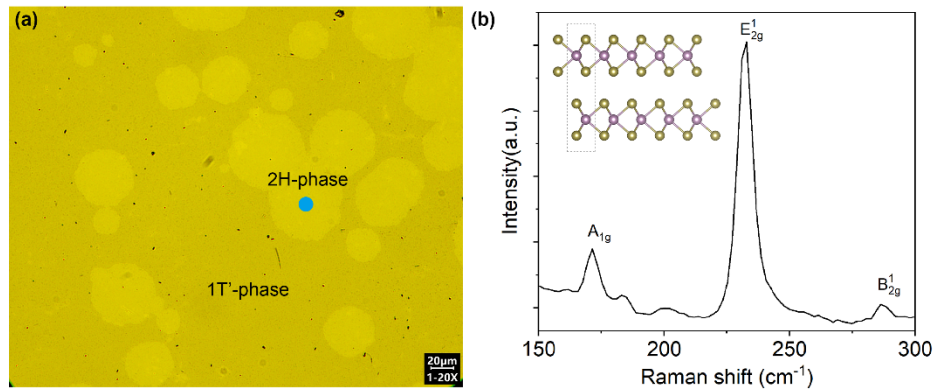

**Fig. S1.** (a) Optical image of MoTe<sub>2</sub> film prepared at 550 °C for 30 min, showing the coexistence of polymorphic 2H and 1 T' phase. (b) Typical Raman spectrum of 2H-MoTe<sub>2</sub>.

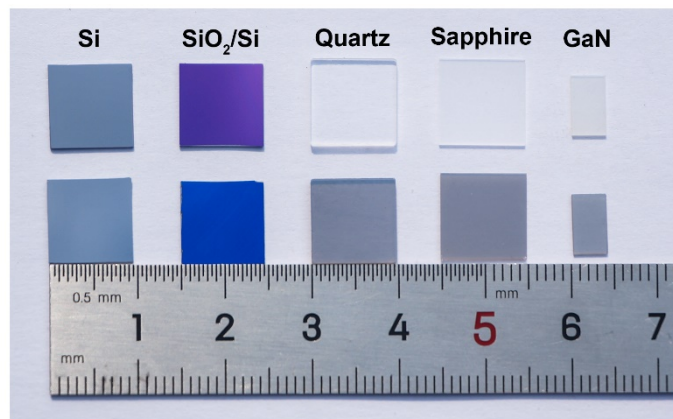

**Fig. S2.** Photographs of the sapphire, quartz, Si, and GaN substrates before (up) and after (bottom) the growth of 1T'-MoTe<sub>2</sub> films.

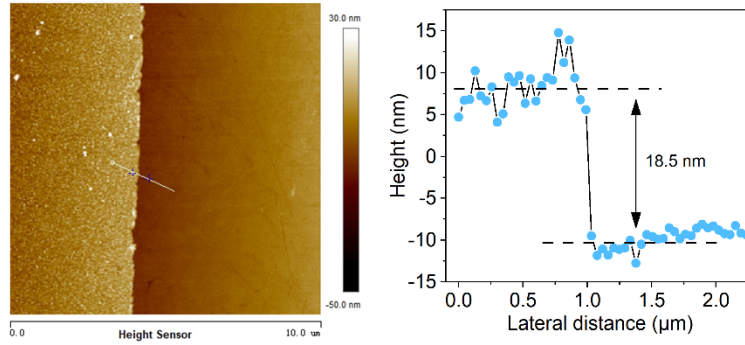

**Fig. S3.** Atomic force microscopy image of the 1T'-MoTe<sub>2</sub> used for device fabrication. The thickness is ~18.5 nm.

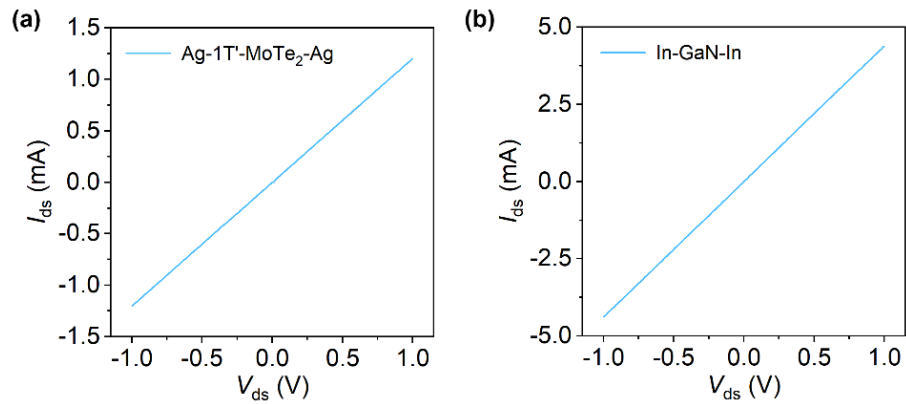

**Fig. S4.**  $I_{ds}$ - $V_{ds}$  curves of Ag-1T'-MoTe<sub>2</sub>-Ag (a) and In-GaN-In (b) devices, presenting typical Ohmic contact behavior.

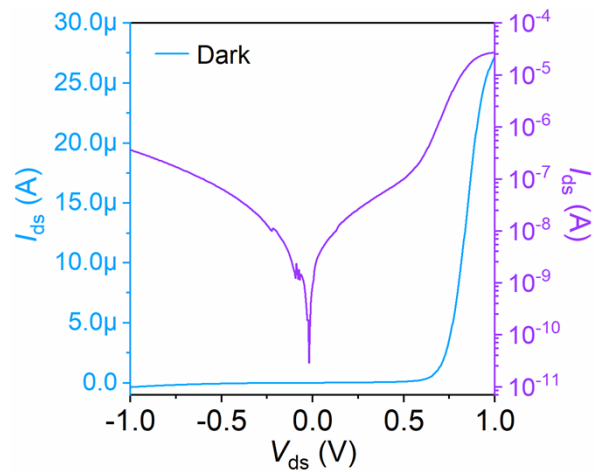

**Fig. S5.** The linear and logarithmic scale plots of  $I_{ds}$ - $V_{ds}$  of the 1T'-MoTe<sub>2</sub>/GaN heterojunction device under dark.

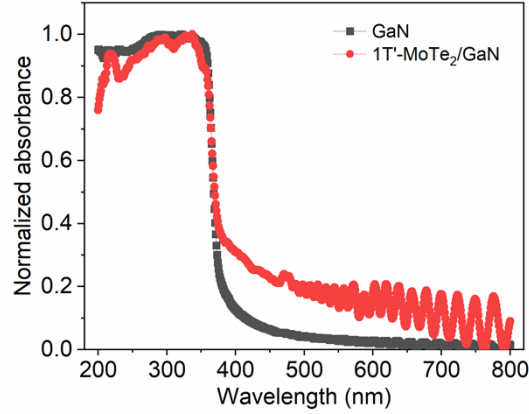

**Fig. S6.** Normalized absorption spectra of GaN and 1T'-MoTe<sub>2</sub>/GaN heterostructure.

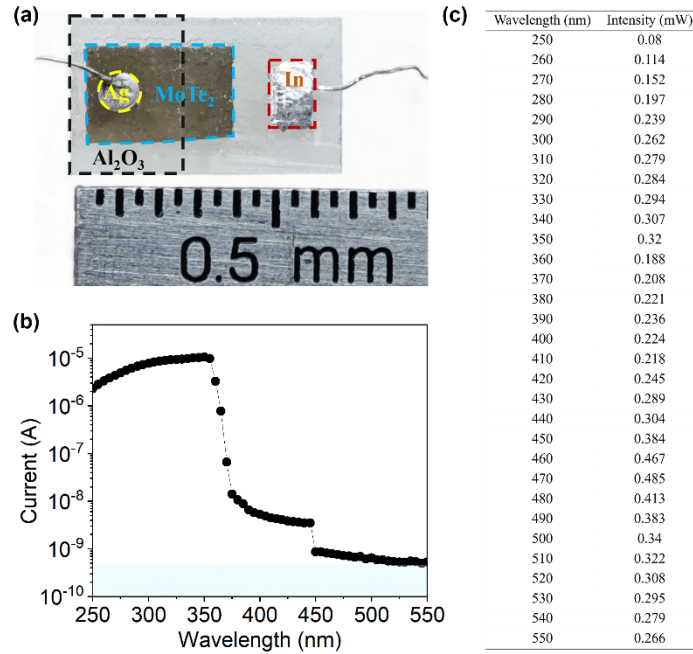

**Fig. S7.** (a) Photograph of the fabricated 1T'-MoTe<sub>2</sub>/GaN photodiode. (b) The wavelength-dependent  $I_{ds}$  of the 1T'-MoTe<sub>2</sub>/GaN photodiode at zero bias and (c) the corresponding light intensity for each wavelength.

Here, we take the illumination density of 0.384 mW/cm<sup>2</sup> as an example to calculate the responsivity  $R$ . The laser power is  $\sim 153.7 \mu\text{W}$  with a spot area of  $\sim 0.4 \text{ cm}^2$ , yielding a power density  $P_{in}$  of  $\sim 0.384 \text{ mW/cm}^2$ . The effective junction area  $A$  is  $\sim 0.03 \text{ cm}^2$ . From the

$I_{ds}$ - $V_{ds}$  curves in Figure 3e, the short-circuit current  $I_{ph}$  is  $\sim 5.72 \times 10^{-7}$  A. The  $R$  is calculated by  $R = I_{ph} / (P_{in} \times A) = (5.72 \times 10^{-7} \text{ A}) / (0.384 \text{ mW/cm}^2 \times 0.03 \text{ cm}^2) = 49.6 \text{ mA/W}$

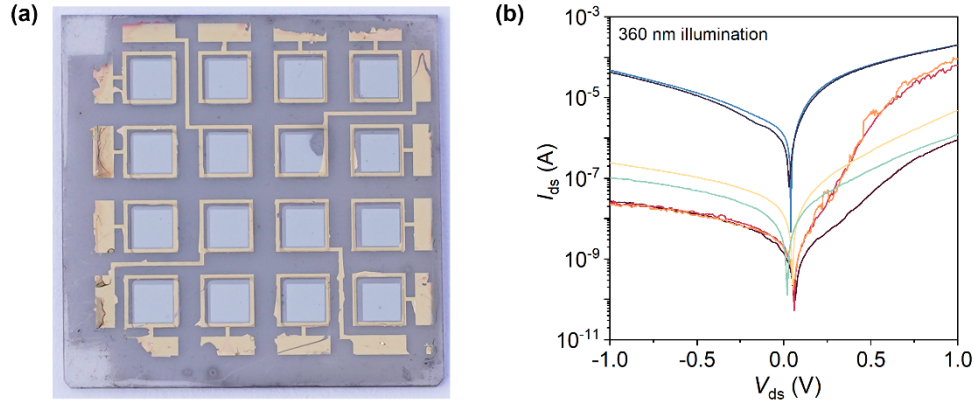

**Fig. S8.** (a) Photograph of the 1T'-MoTe<sub>2</sub>/GaN heterostructure arrays through the in-situ growth of 1T'-MoTe<sub>2</sub> directly onto GaN substrates. (b)  $I_{ds}$ - $V_{ds}$  curve of seven devices under the illumination of 360 nm light. It shows that most of these devices exhibit either no response or significantly reduced photocurrent compared to devices that the 1T'-MoTe<sub>2</sub> layer is transferred onto GaN.

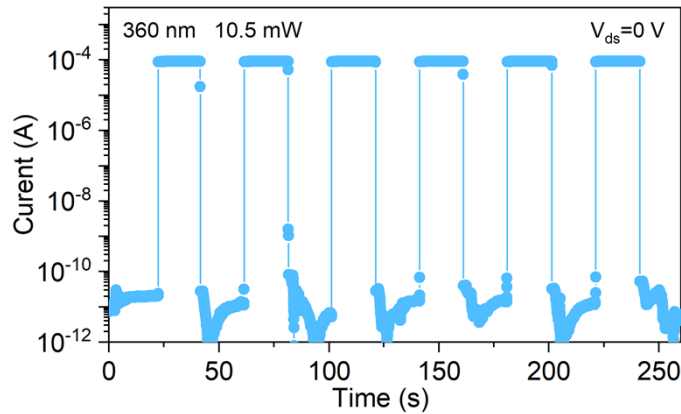

**Fig. S9.**  $I$ - $t$  characteristics of the device under 360 nm irradiation of 10.5 mW ( $V_{ds}=0$  V), which shows favorable repeatability and a high  $I_{light}/I_{dark}$  of  $\sim 4.9 \times 10^6$ .

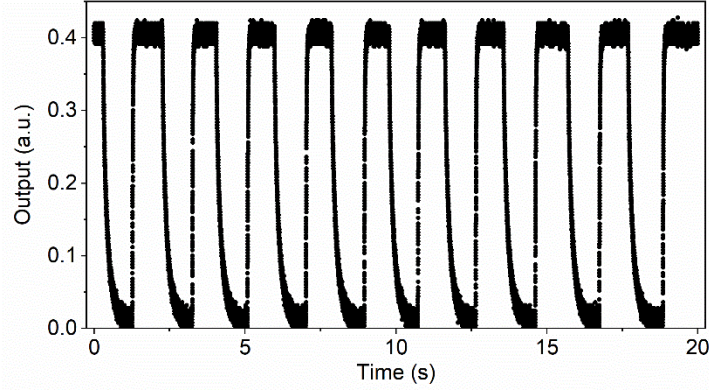

**Fig. S10.**  $I$ - $t$  characteristics of the device measured with an oscilloscope to evaluate the response speed.

**Table S2.** Comparison of the figures-of-merit of 2D material/GaN heterostructure-based UV photodetectors

| Device structure                         | $\lambda$ (nm)    | Power (mW/cm <sup>2</sup> ) | $I_{on}/I_{off}$ | $R$ (A/W)                  | $D$ (Jones)                                                          | $\tau_{rise}/\tau_{decay}$            | $R_{UV}/R_{vis}$ | Ref. |
|------------------------------------------|-------------------|-----------------------------|------------------|----------------------------|----------------------------------------------------------------------|---------------------------------------|------------------|------|
| ReS <sub>2</sub> /WS <sub>2</sub> /p-GaN | 365               | 0.069                       | ~30 (1V)         | 3.78 (1V)                  | $2.1 \times 10^{12}$ (1V)                                            | 259/374 $\mu$ s (1V)                  |                  | 1    |
| MoS <sub>2</sub> /p-GaN                  | 532               | 0.8                         |                  | 0.13 (0 V)                 | $3.8 \times 10^{10}$ (0 V)                                           | 18.5/123.2 ms (4 mW/cm <sup>2</sup> ) |                  | 2    |
| Bi <sub>2</sub> Se <sub>3</sub> /GaN     | 366               | 20                          |                  | $5.9 \times 10^{-3}$ (0 V) |                                                                      | 63/43 ms                              |                  | 3    |
| MoS <sub>2</sub> /GaN                    | 365               | 0.5                         |                  | 10.1                       | $2.3 \times 10^{13}$                                                 | 0.5/4.2 ms                            |                  | 4    |
| MoS <sub>2</sub> /p-GaN                  | 416<br>365<br>520 | 1.46 mW                     |                  | 35.6<br>19.6<br>8.4 (4 V)  | $5.5 \times 10^{11}$<br>$2.9 \times 10^{11}$<br>$1.2 \times 10^{11}$ | 350<br>ms/2.21 s                      |                  | 5    |
| MoS <sub>2</sub> /GaN                    | 532<br>365        | 56.5<br>46.9                | 4<br>5.4         | 328 (5 V)<br>27.1(5 V)     | $2 \times 10^{11}$<br>$1.7 \times 10^{10}$                           | 0.4/2.6 s<br>0.3/3.9 s                |                  | 6    |

|                                |        |                  |                     |                               |                               |                         |                                                            |              |
|--------------------------------|--------|------------------|---------------------|-------------------------------|-------------------------------|-------------------------|------------------------------------------------------------|--------------|
| MoS <sub>2</sub> /GaN          | 365    | 1                |                     | 1.8×10 <sup>4</sup><br>(1 V)  | 7.5×10 <sup>12</sup><br>(1 V) | ~0.1/0.6 s              |                                                            | 7            |
| MXene/GaN                      | 355    | 0.03             |                     | 0.284<br>(0 V)                | 7.1×10 <sup>13</sup><br>(0 V) | 7.55<br>μs/1.67 ms      | R <sub>355</sub> /R <sub>500</sub><br>=532                 | 8            |
| PtSe <sub>2</sub> /GaN         | 265    | 2.4              | 10 <sup>8</sup>     | 0.193<br>(0 V)                | 3.8×10 <sup>14</sup><br>(0 V) | 0.14/7.75<br>ms         |                                                            | 9            |
| WS <sub>2</sub> /GaN           | 375    | 10 <sup>-3</sup> | ~10 <sup>3</sup>    | 0.226                         | 4×10 <sup>14</sup>            | 10.1/2.55<br>ms (10 Hz) |                                                            | 10           |
| MoS <sub>2</sub> /GaN          | 265    | 2.4              | 10 <sup>5</sup>     | 0.015<br>(0 V)                | 1.5×10 <sup>12</sup><br>(0 V) | 0.3/3.6 ms<br>(100 Hz)  |                                                            | 11           |
| MoS <sub>2</sub> /h-<br>BN/GaN | 560    | 8                |                     | 1.2×10 <sup>-3</sup><br>(9 V) |                               | 0.5/0.3 s               |                                                            | 12           |
| 1T'-<br>MoTe <sub>2</sub> /GaN | 360 nm | 10.5             | 4.9×10 <sup>6</sup> | 5×10 <sup>-2</sup><br>(0 V)   | 3.5×10 <sup>12</sup><br>(0 V) | 0.04/0.45 s             | R <sub>350</sub> /R <sub>400</sub><br>=1.6×10 <sup>4</sup> | This<br>work |

## References

1. Q. Zheng, Z. Qiu, Q. Zhang, M. Yang, J. Lei, L. Han, L. Tang, Z. Zheng, X. Wang and J. Li, *ACS Applied Nano Materials*, 2023, **6**, 15490-15497.
2. B.-W. Liang, W.-H. Chang, C.-S. Huang, Y.-J. Huang, J.-H. Chen, K.-S. Li, K. B. Simbulan, H. Kumar, C.-Y. Su, C.-H. Kuan and Y.-W. Lan, *Nanoscale*, 2023, **15**, 18233-18240.
3. Z. Zeng, D. Wang, X. Fang, C. Zhao, B. Zhang, D. Liu, T. Chen, J. Pan, S. Liu, G. Liu, T. Liu, H. Jin, S. Jiao, L. Zhao and J. Wang, *Materials Today Nano*, 2023, **23**, 100372.
4. Y. Zheng, B. Cao, X. Tang, Q. Wu, W. Wang and G. Li, *ACS Nano*, 2022, **16**, 2798-2810.
5. Y. Yang and W. Sun, *ACS Applied Nano Materials*, 2024, **7**, 84-91.
6. X. Zhang, J. Li, Z. Ma, J. Zhang, B. Leng and B. Liu, *ACS Applied Materials &*

*Interfaces*, 2020, **12**, 47721-47728.

7. S. K. Jain, M. X. Low, P. D. Taylor, S. A. Tawfik, M. J. S. Spencer, S. Kuriakose, A. Arash, C. Xu, S. Sriram, G. Gupta, M. Bhaskaran and S. Walia, *ACS Applied Electronic Materials*, 2021, **3**, 2407-2414.
8. W. Song, J. Chen, Z. Li and X. Fang, *Advanced Materials*, 2021, **33**, 2101059.
9. R. Zhuo, L. Zeng, H. Yuan, D. Wu, Y. Wang, Z. Shi, T. Xu, Y. Tian, X. Li and Y. H. Tsang, *Nano Research*, 2019, **12**, 183-189.
10. Z. Zhao, D. Wu, J. Guo, E. Wu, C. Jia, Z. Shi, Y. Tian, X. Li and Y. Tian, *Journal of Materials Chemistry C*, 2019, **7**, 12121-12126.
11. R. Zhuo, Y. Wang, D. Wu, Z. Lou, Z. Shi, T. Xu, J. Xu, Y. Tian and X. Li, *Journal of Materials Chemistry C*, 2018, **6**, 299-303.
12. H. Jeong, S. Bang, H. M. Oh, H. J. Jeong, S. J. An, G. H. Han, H. Kim, K. K. Kim, J. C. Park, Y. H. Lee, G. Lerondel and M. S. Jeong, *ACS Nano*, 2015, **9**, 10032-10038.
